# Supplementary material for: Effectiveness of a respiratory rehabilitation program including an inspiration training device versus traditional respiratory rehabilitation: a randomized controlled trial
Source: PeerJ journal article supplement (doi:10.7717/peerj.16360), 2023-12-15
Supplement: SearchResults.pdf [file SearchResults.pdf]

## ClinicalTrials.gov Search Results 07/23/2023

|   | Title                                                                                            | Status    | Study Results        | Conditions                                                                                       | Interventions                                                                                 | Locations                                                                                    |
|---|--------------------------------------------------------------------------------------------------|-----------|----------------------|--------------------------------------------------------------------------------------------------|-----------------------------------------------------------------------------------------------|----------------------------------------------------------------------------------------------|
| 1 | <a href="#">Comparison of Two Respiratory Physiotherapy Treatments in Postcovid-19 Patients.</a> | Completed | No Results Available | <ul style="list-style-type: none"><li>•COVID-19</li><li>•Respiratory Distress Syndrome</li></ul> | <ul style="list-style-type: none"><li>•Device: PowerBreathe and PEP Therosold tools</li></ul> | <ul style="list-style-type: none"><li>•Universidad Católica de Ávila, Ávila, Spain</li></ul> |

U.S. National Library of Medicine | U.S. National Institutes of Health | U.S. Department of Health & Human Services
